# Supplementary material
Source: Research Square preprint supplement (doi:10.21203/rs.3.rs-8895167/v1)
Supplement: Supplementary file 1 [file 4dd589d5c78b2b3e76e33c2d.pdf]

**Table S1. Primers used in this study.**

|                                 |                                                |
|---------------------------------|------------------------------------------------|
| R41A-F                          | gcgcgaggggtgcgagctacgggaagcggcgg               |
| R41A-R                          | gcgcaccctcgcgcccacggcggccacctcaa               |
| R44A-F                          | gccggaggggtggccagctacgggaagcggcgg              |
| R44A-R                          | ggccaccctccggcccacggcggccacctcaa               |
| L432W-F                         | acacaatggacaccatttaatggctatgctggagcaaag        |
| L432W_R                         | aaatggtgtccattgtgtgattttgcaaaccagaagtcca       |
| I391W_F                         | aaaaaatggataacttatgacctgattaatatgatgtggagaaa   |
| I391W_R                         | gtcataagttatccatttttctgtaggtagttactctcc        |
| I392W_F                         | aaaaaaaaatctggacttatgacctgattaatatgatgtggagaaa |
| I392W_R                         | gtcataagtccagatttttctgtaggtagttactctcc         |
| Fatp2b_F                        | acaggtgctactcttgccctgcggaactaaatttcag          |
| Fatp2b-R                        | caagagtagcacctgtggtccagaagtataaatgtata         |
| EcoRI_Nter_FATP2                | ccggaattcatgctttccgcatctacaca                  |
| XbaI_Cter_FATP2                 | ctagtctagacttatcgtcgtcatcctgtaa                |
| V36W-F                          | aagtgggcccgcctggccggaggggtgcgagc               |
| V36W-R                          | cacggcggcccactcaagaagtagcctatgtcctg            |
| A37W-F                          | aaggtgtggccgctgggcccggaggggtgcgagc             |
| A37W-R                          | cacggcccacacctcaagaagtagcctatgtcctg            |
| V39W-F                          | aaggtggccgctgggcccggaggggtgcgagc               |
| V39W-R                          | ccaggcggcccactcaagaagtagcctatgtcctg            |
| L248W-F                         | actggctggactttgtaagcggattgaaggcagatgat         |
| L248W-R                         | tacaaaagtcagccagttccataccatgatgcgctgatg        |
| I391W-I392W-F                   | aaaaaatggtggacttatgacctgattaatatgatgtggagaaa   |
| I391W-I392W-R                   | gtcataagttccaccatttttctgtaggtagttactctcc       |
| L432W-F                         | acacaatggacaccatttaatggctatgctggagcaaag        |
| L432W-R                         | aaatggtgtccattgtgtgattttgcaaaccagaagtcca       |
| R42A_F                          | gcgcgaggggtgcgagctacgggaagcggcgg               |
| R42A_R                          | gcgcaccctcgcgcccacggcggccacctcaa               |
| R41A-R42A-R44A_F                | gcgcggccggtggccagctacgggaagcggcgg              |
| R41A-R42A-R44A_R                | ggccacggccgcgcccacggcggccacctcaa               |
| K48A_F                          | ggggcgcggcggccggcgcgaccatcctgcg                |
| K48A_R                          | ggccgcccgcgccccgtagctgcgaccctccgg              |
| R49A_F                          | gggaaggcccggcggcgcgaccatcctgcg                 |
| R49A_R                          | ggccgggctcccgtagctgcgaccctccgg                 |
| R50A_F                          | gggaagcgggcaccggcgcgaccatcctgcg                |
| R50A_R                          | ggtgcccgctcccgtagctgcgaccctccgg                |
| K48A-R49A-R50A_F                | ggggcggccgcaccggcgcgaccatcctgcg                |
| K48A-R49A-R50A_R                | ggtgcccggccccgtagctgcgaccctccgg                |
| R41A/R42A/R44A/K48A/R49A/R50A_F | gccagctacggggcggccgcaccggcgcgaccatcctg         |
| R41A/R42A/R44A/K48A/R49A/R50A_R | cgccccgtagctggccacggccgcgcccacggcggcca         |

**Table S2. Statistics for data collection and refinement**

|                                                         | FATP2<br>C18-AMP | FATP2<br>Lipofermata |
|---------------------------------------------------------|------------------|----------------------|
| PDB                                                     | 28KF             | 28KR                 |
| EMDB                                                    | EMD-<br>56574    | EMD-<br>56581        |
| <b>Data collection and processing</b>                   |                  |                      |
| Magnification                                           | 105,000          | 105,000              |
| Voltage (kV)                                            | 300              | 300                  |
| Electron exposure (e <sup>-</sup> /<br>Å <sup>2</sup> ) | 42               | 42                   |
| Defocus range (µm)                                      | 2.0 - 0.8        | 2.0 - 0.8            |
| Pixel size (Å)                                          | 0.836            | 0.836                |
| Symmetry imposed                                        | C1               | C1                   |
| Initial particle images<br>(no.)                        | 12,718,109       | 13,705,110           |
| Final particle images<br>(no.)                          | 211,297          | 135,106              |
| Map resolution (Å)                                      | 3.68             | 3.70                 |
| FSC threshold                                           | 0.143            | 0.143                |
| Map resolution range<br>(Å)                             | 3.2 - 5.0        | 3.2 - 5.1            |
| <b>Refinement</b>                                       |                  |                      |
| Initial model used (PDB<br>code)                        | AF2              | AF2                  |
| Model resolution (Å)                                    | 3.78             | 4.00                 |
| FSC threshold                                           | 0.50             | 0.50                 |
| Model composition                                       |                  |                      |
| Non-hydrogen atoms                                      | 10,059           | 4995                 |
| Ligands                                                 | 42               | 21                   |
| <i>B</i> factors (Å <sup>2</sup> )                      |                  |                      |
| Protein                                                 | 58.77            | 52.33                |
| Ligand                                                  | 47.54            | 36.50                |
| R.m.s. deviations                                       |                  |                      |
| Bond lengths (Å)                                        | 0.005            | 0.004                |
| Bond angles (°)                                         | 0.604            | 0.942                |
| Validation                                              |                  |                      |
| MolProbity score                                        | 1.85             | 2.23                 |
| Clashscore                                              | 7.10             | 11.09                |
| Poor rotamers (%)                                       | 0.19             | 1.70                 |
| Ramachandran plot                                       |                  |                      |
| Favored (%)                                             | 92.75            | 91.71                |
| Disallowed (%)                                          | 0.16             | 0.16                 |

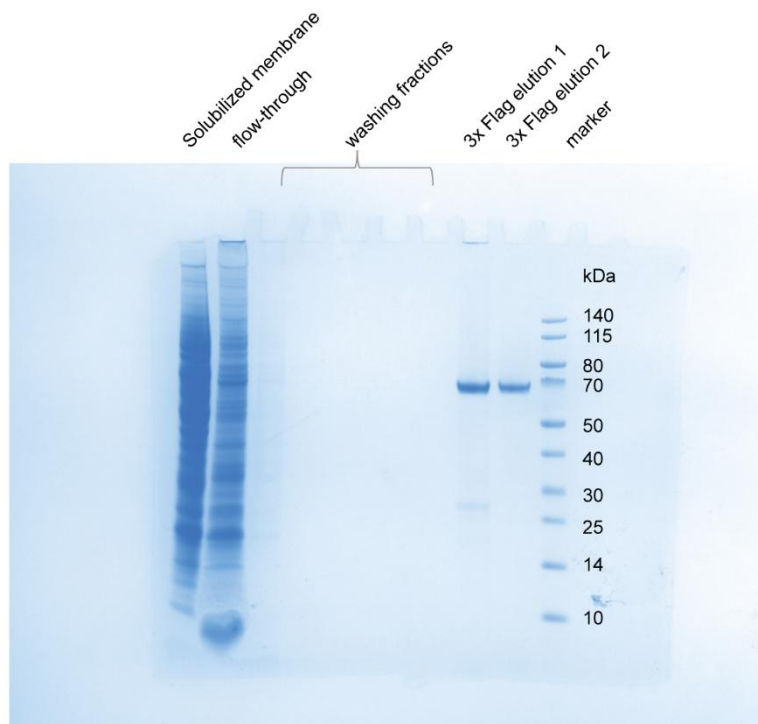

**Supplementary Fig. 1. Purification of human FATP2.** Uncropped SDS-PAGE of purification for Flag tagged FATP2. PageRuler pre-stained protein ladder shows FATP2 band at 70 kDa on a NuPAGE Bis-Tris mini protein gel (4–12%, 1.0–1.5 mm). Similar results were obtained for all purification performed.

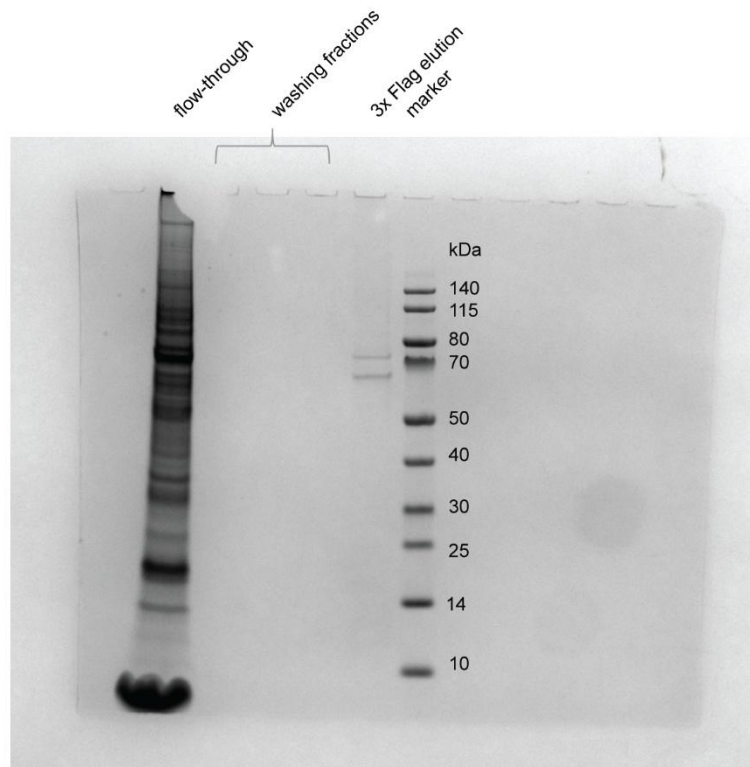

**Supplementary Fig. 2. Purification of human FATP2b.** Uncropped SDS-PAGE of purification for Flag tagged FATP2b. PageRuler pre-stained protein ladder shows FATP2b band below 70 kDa on a NuPAGE Bis-Tris mini protein gel (4–12%, 1.0–1.5 mm). A band slightly above 70 kDa marker is likely HSP70.

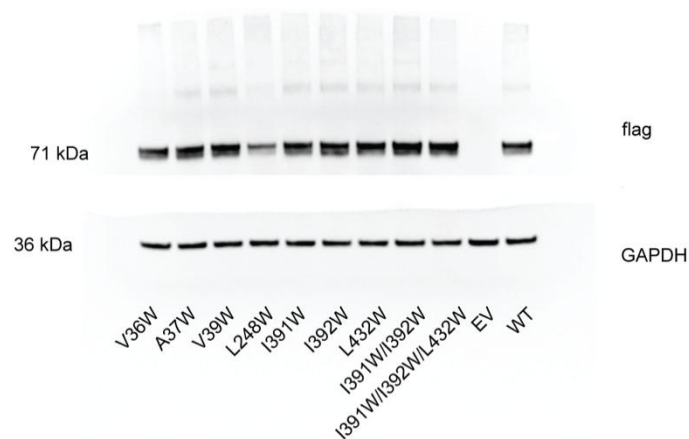

**Supplementary Fig. 3. Uncropped western blots of tunnel mutants.** After transfer, membranes were cut into half prior to blocking and antibody incubation. The top half was probed with anti-flag antibody and bottom were probed with anti-GAPDH antibody. Experiments were repeated three times ( $n=3$ ) and quantified using ImageJ.

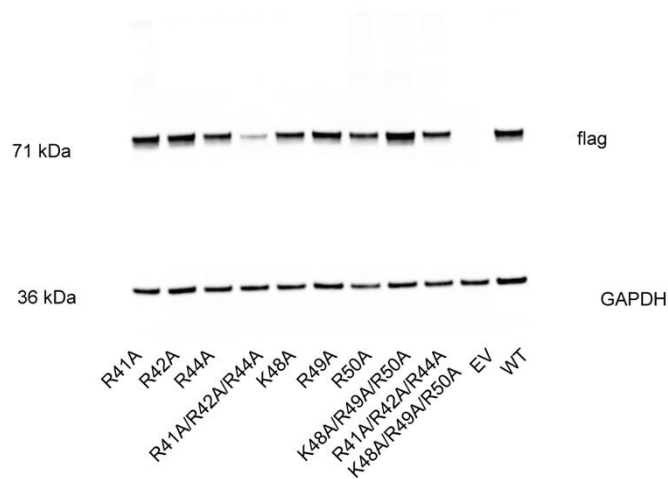

**Supplementary Fig. 4. Uncropped western blots of APH mutants.** After transfer, membranes were cut into half prior to blocking and antibody incubation. The top half was probed with anti-flag antibody and bottom were probed with anti-GAPDH antibody. Experiments were repeated three times (n=3) and quantified using ImageJ.

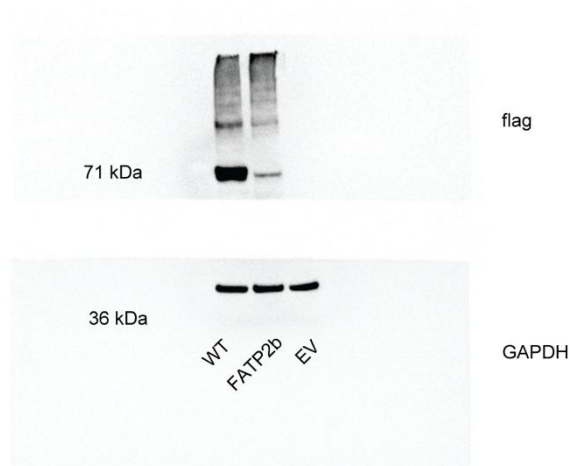

**Supplementary Fig. 5. Uncropped western blots of FATP2b.** After transfer, membranes were cut into half prior to blocking and antibody incubation. The top half was probed with anti-flag antibody and bottom were probed with anti-GAPDH antibody. Experiments were repeated three times (n=3) and quantified using ImageJ.

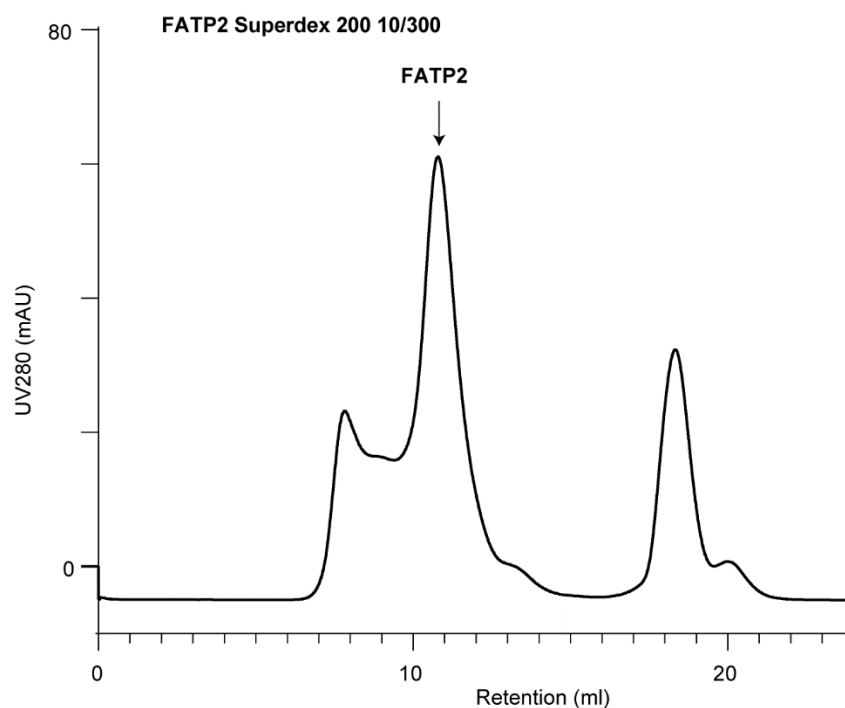

**Supplementary Fig. 6** Elution profile of FATP2 on a size exclusion chromatography column (Superdex 200 Increase 10/300) in 25 mM HEPES pH 7.0 buffer containing 150 mM NaCl, 0.02% DDM and 0.002% CHS. FATP2 is eluted at ~11 ml. Similar results were obtained for all purification performed.

CryoEM data processing (FATP2\_C18-AMP)

EM-1856-HS-1\_2

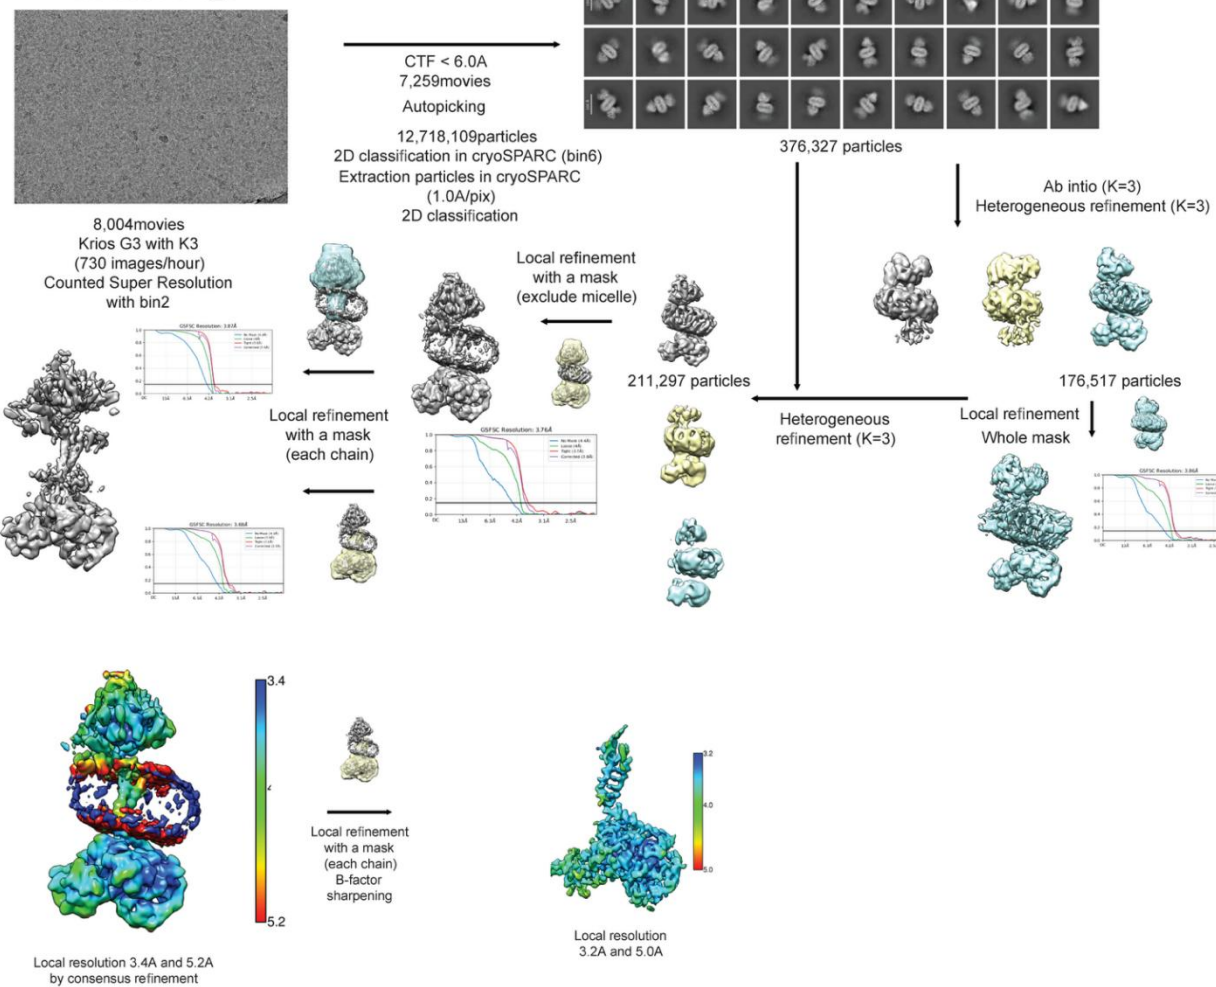

Supplementary Fig. 7. Cryo-EM processing workflow and classification for FATP2 in complex with adenylate intermediate.

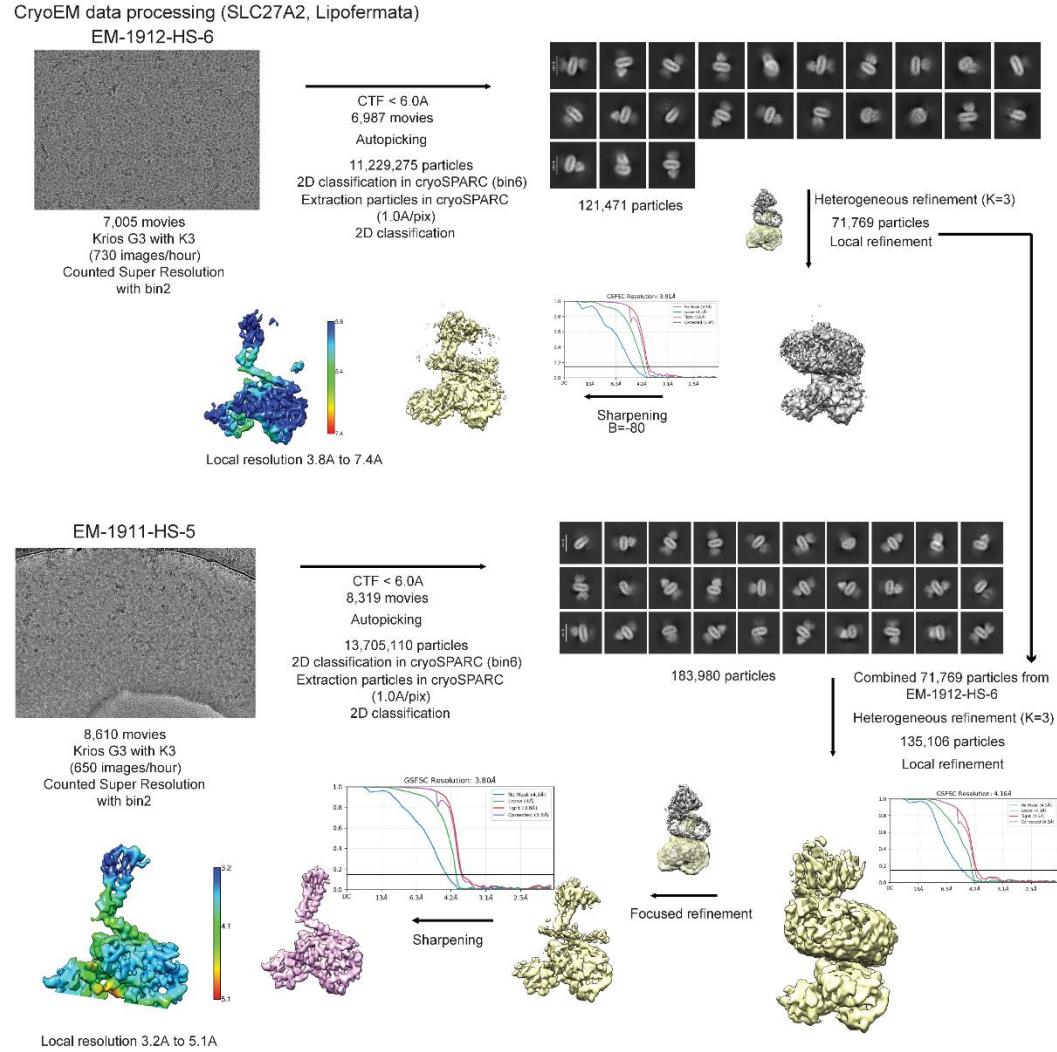

**Supplementary Fig. 8. Cryo-EM processing workflow and classification for FATP2 in complex with lipofermata.**

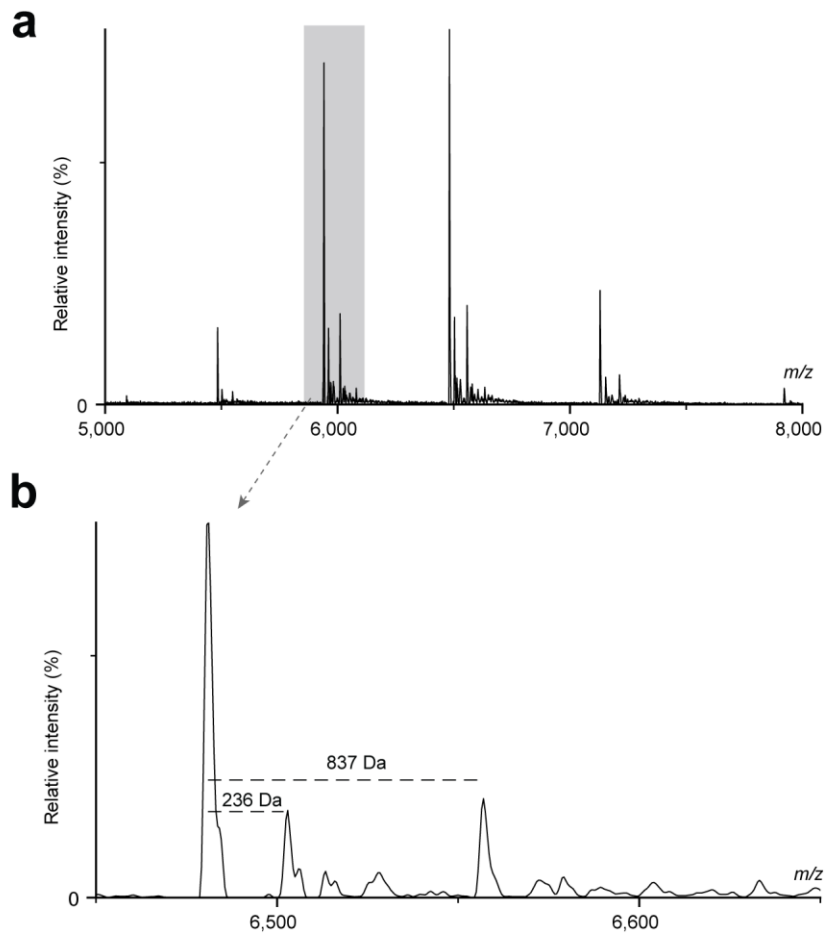

**Supplementary Fig. 9. nMS spectrum of FATP2 under negative mode shows mass shift of +236 Da, consistent with palmitoylation. a.** nMS spectrum of FATP2 within m/z range of 5,000-6,000. **b.** Focused view of FATP2 at the 18<sup>-</sup> charge state.

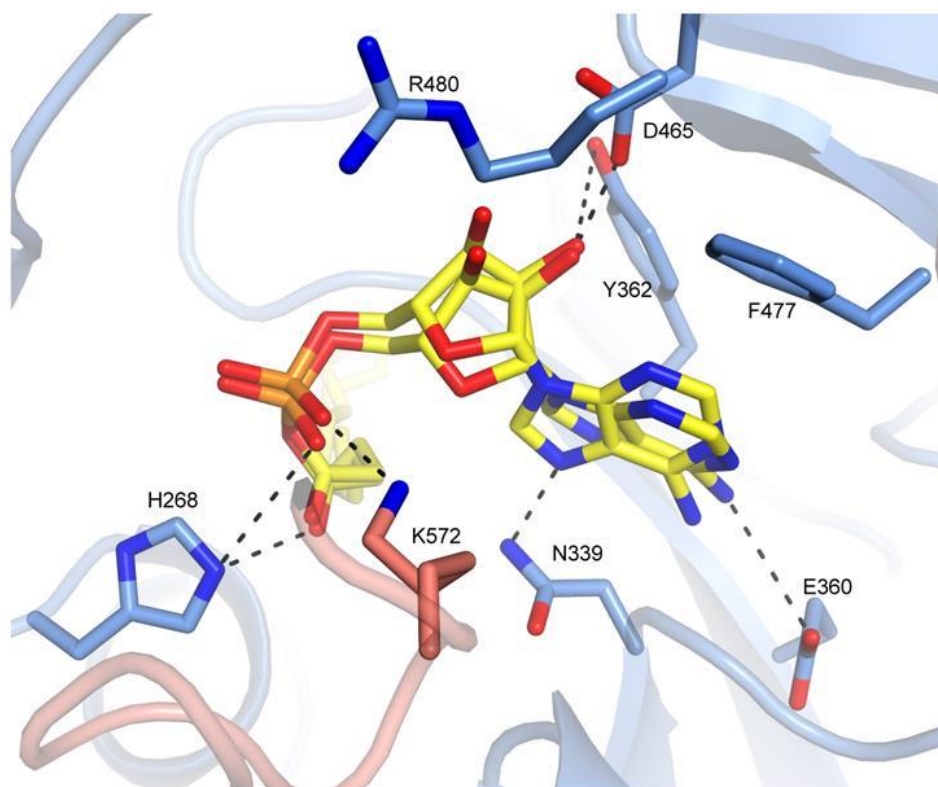

**Supplementary Fig. 10. Binding site for AMP moiety in the adenylate intermediate complex structure.** Cartoon is shown in blue for central domain and salmon for C-terminal domain. Dash line denotes hydrogen bonds.



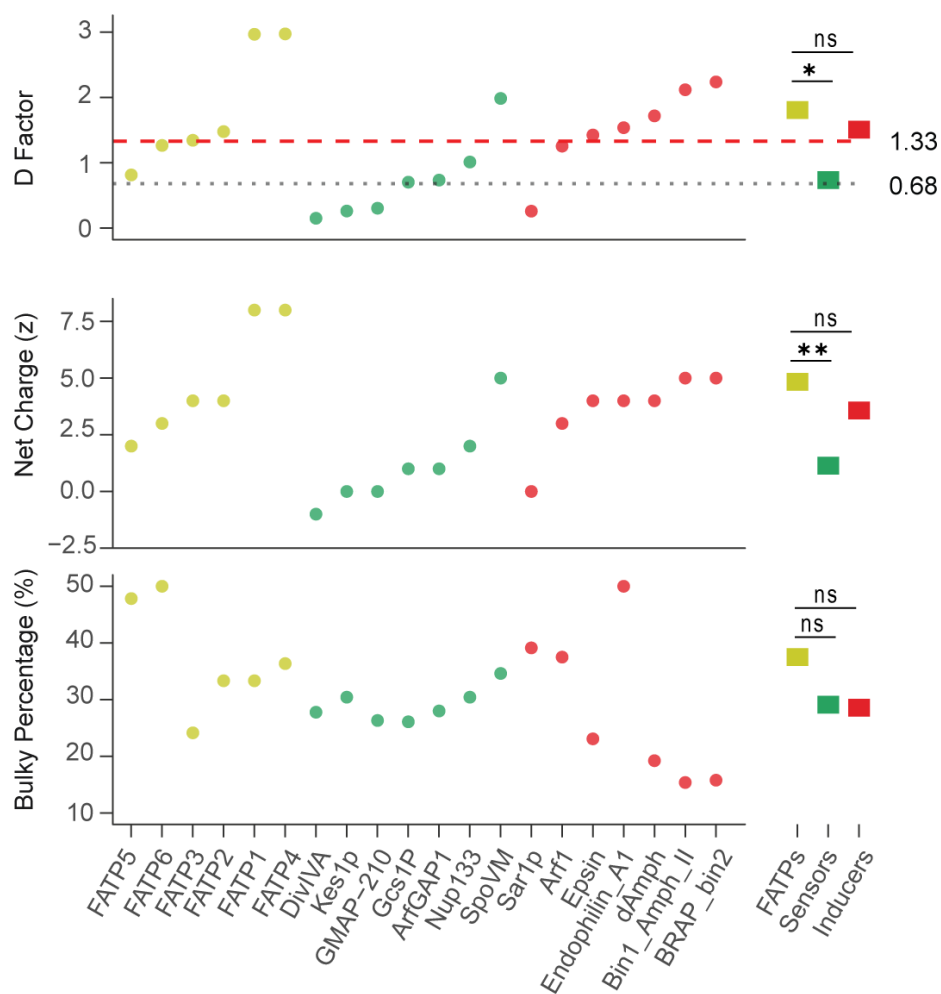

**Supplementary Fig. 12. Analysis of amphipathic helices from FATPs, ALPS sensors, and curvature inducers.** The scatter plot shows D-factor, net charge and overall density of bulky residues.

- 1 Konagurthu, A. S., Whisstock, J. C., Stuckey, P. J. & Lesk, A. M. MUSTANG: a multiple structural alignment algorithm. *Proteins* **64**, 559-574 (2006). <https://doi.org:10.1002/prot.20921>
- 2 Robert, X. & Gouet, P. Deciphering key features in protein structures with the new ENDscript server. *Nucleic Acids Res* **42**, W320-324 (2014). <https://doi.org:10.1093/nar/gku316>
